# 1                   Stress-Induced Transient Cell Cycle Arrest

## 2                   Coordinates Metabolic Resource Allocation to

### 3                   Balance Adaptive Tradeoffs

4 Alain R. Bonny<sup>1</sup>, Karl Kochanowski<sup>2</sup>, Maren Diether<sup>3</sup>, Hana El-Samad<sup>1,4\*</sup>

5 <sup>1</sup>Department of Biochemistry and Biophysics, California Institute for Quantitative Biosciences,  
6 University of California, San Francisco, San Francisco, CA 94158, USA

7 <sup>2</sup>Department of Pharmaceutical Chemistry, California Institute for Quantitative Biosciences,  
8 University of California, San Francisco, San Francisco, CA 94158, USA

9 <sup>3</sup>Institute of Molecular Systems Biology, ETH Zürich, Zürich, Switzerland

10 <sup>4</sup>Chan Zuckerberg Biohub, San Francisco, CA 94158, USA

11 \*To whom correspondence should be addressed: Hana.El-Samad@ucsf.edu

## 12 **Abstract**

13                   The ability of a cell to mount a robust response to an environmental perturbation is  
14 paramount to its survival. While cells deploy a spectrum of specialized counter-measures to  
15 deal with stress, a near constant feature of these responses is a down regulation or arrest of the  
16 cell cycle. It has been widely assumed that this modulation of the cell cycle is instrumental in

17 facilitating a timely response towards cellular adaptation. Here, we investigate the role of cell  
18 cycle arrest in the hyperosmotic shock response of the model organism *S. cerevisiae* by  
19 deleting the osmoshock-stabilized cell cycle inhibitor Sic1, thus enabling concurrent stress  
20 response activation and cell cycle progression. Contrary to expectation, we found that removal  
21 of stress-induced cell cycle arrest accelerated the adaptive response to osmotic shock instead  
22 of delaying it. Using a combination of time-lapse microscopy, genetic perturbations and  
23 quantitative mass spectrometry, we discovered that unabated cell cycle progression during  
24 stress enables the liquidation of internal glycogen stores, which are then shunted into the  
25 osmotic shock response to fuel a faster adaptation. Therefore, osmo-adaptation in wild type  
26 cells is delayed because cell cycle arrest diminishes the ability of the cell to tap its glycogen  
27 stores. However, acceleration of osmo-adaptation in mutant cells that do not arrest comes at the  
28 cost of acute sensitivity to a subsequent osmo-stress. This indicates that despite the ostensible  
29 advantage faster adaptation poses, there is a trade-off between the short-term benefit of faster  
30 adaptation and the vulnerability it poses to subsequent insults. We suggest that cell cycle arrest  
31 acts as a carbon flux valve to regulate the amount of material that is devoted to osmotic shock,  
32 balancing short term adaptation with long-term robustness.

## 33 Introduction

34 Cells and organisms are constantly challenged in their environment with insults that vary  
35 in origin, magnitude and duration. In order to respond to these insults, cells have evolved a  
36 large battery of adaptive stress responses that allow them to survive and maintain their  
37 homeostasis. Different stress responses show a remarkable diversity in their sensing,  
38 regulation, and logic <sup>1-5</sup>. However, an almost constant feature of any stress response is the

39 involvement of cell cycle slow-down or arrest<sup>6-10</sup>. It is widely assumed that this is because it is  
40 advantageous for a cell not to divide during stressful conditions in order to safeguard its own  
41 fitness and that of its future progeny<sup>11,12</sup>. Furthermore, by arresting division, resources and  
42 energy can be diverted from the replication and division program to the stress response  
43 program, allowing it to proceed more efficiently<sup>13</sup>. Despite the near universality of these  
44 assumptions, the precise contribution of cell cycle arrest to adaptation remains poorly  
45 understood.

46       Upon encountering an environmental perturbation, the model organism *Saccharomyces*  
47 *cerevisiae* is thought to divert its limited resources such as ribosomes to high-priority transcripts  
48<sup>14,15</sup>. However, this diversion conflicts with other ongoing and resource-intensive processes such  
49 as cell cycle progression. Concomitant cell cycle arrest can therefore relieve this resource  
50 competition, allowing the cell to adequately mitigate the effects of stress<sup>13</sup>. While this model  
51 stands to reason intuitively, embedded within that conceptual framework are competing  
52 optimization problems that the cell must confront: properly addressing the stress to ensure  
53 longevity, but doing so in a time-sensitive manner for cell cycle re-entry to promote reproductive  
54 fitness. To understand the tradeoffs involved in a stress response, and interrogate the relative  
55 contribution of cell cycle arrest to cellular adaptation and intracellular process optimization, it is  
56 necessary to decouple the processes in question.

57       To explore this paradigm, we used the hyperosmotic glycerol (HOG) response as a  
58 convenient framework. The HOG program is a canonical stress response activated by the  
59 presence of excess osmolytes in the extracellular environment. The increase in osmotic  
60 pressure difference between the inside and outside of the cell drives water out, causing the  
61 cellular volume to decrease. At the onset of a step input of hyperosmotic shock, the central  
62 HOG mediator, Hog1, rapidly translocates from the cytoplasm to the nucleus where it interacts

63 with a variety of targets to initiate the production and accumulation of glycerol <sup>16</sup>. The  
64 accumulation of glycerol in the cytoplasm re-establishes the osmotic pressure gradient to its  
65 basal level, and once volume has been corrected, Hog1 exits the nucleus <sup>17</sup>. Importantly, in  
66 addition to the initiation of glycerol synthesis, Hog1 stabilizes Sic1, the stoichiometric inhibitor of  
67 b-type cyclins 5 and 6, to transiently arrest the cell in the G1 phase of the cell cycle<sup>11</sup>. Volume  
68 restoration and exit of Hog1 from the nucleus also coincides with resumption of cell cycle  
69 progression <sup>18</sup>. The adaptive translocation pattern of Hog1 has been the subject of many studies  
70 for its robust, reproducible and stereotyped pattern, which acts as a real-time reporter of  
71 hyperosmotic stress adaptation <sup>19,20</sup>.

72       Using HOG as a model system, we investigated the role of transient cell cycle arrest in  
73 the adaptive response to hyperosmotic shock. Our approach was to decouple the HOG  
74 response program from the canonical cell cycle machinery by removing the stress response-cell  
75 cycle link, Sic1, such that both processes proceed simultaneously during osmotic shock. By  
76 following Hog1 translocation as a reporter of HOG adaptation, we were able to quantify  
77 deviations from Hog1's stereotyped translocation pattern as an indication of an altered stress  
78 response. Surprisingly, we found that unabated cell cycle progression during osmoshock  
79 accelerated osmo-adaptation as measured by Hog1 translocation. Remarkably, other canonical  
80 markers of adaptation such as glycerol production and volume recovery also proceeded faster.  
81 These data indicated that cell cycle arrest impedes, rather than facilitates, adaptation to stress.  
82 To pinpoint the mechanistic roots of this phenotype, we used mass spectrometry <sup>13</sup>C isotope  
83 tracing to probe the differences in metabolic flux between wild type and cell cycle  
84 arrest-disabled cells. We discovered that progression in the cell cycle during osmostress  
85 initiated catabolism of internal glycogen that is mediated by the enzyme Gph1. Breakdown of  
86 glycogen fueled faster glycerol synthesis in the mutant cells, giving them the ability to restore

87 turgor pressure faster than the wild type. Therefore, cell cycle seems to be the guardian of a  
88 metabolic valve that remains closed when cell cycle is arrested. To investigate what  
89 vulnerabilities arise from opening of this valve, and rationalize why the wild type cells still  
90 implement cell cycle arrest despite the delay it imposes on stress adaptation, we subjected cells  
91 to repeated osmostress pulses. Under repeated pulsing, wild type cells largely return to their  
92 basal morphology while mutant cells lacking cell cycle arrest display physical traits suggestive of  
93 a compromised cell wall. This phenotype accumulates within the mutant population with each  
94 repeated stress pulse. Therefore, adaptation to an osmotic stress proceeds faster when there is  
95 no cell cycle arrest, but this phenotype leaves the cells particularly susceptible to subsequent  
96 osmoshocks. Our findings reveal an example where connection between three important  
97 cellular networks - a stress pathway, cell cycle regulation, and metabolic control - collaborate in  
98 order to strike a balance between mounting a rapid adaptive response to acute threats and  
99 prioritizing robustness in the face of future insults.

## 100 Results

### 101 **Removal of Hog1-mediated cell cycle arrest accelerates adaptation to hyperosmotic** 102 **shock**

103 To assess the role of cell cycle arrest in adaptation to osmotic shock, we removed the  
104 ability of Hog1 to initiate cell cycle arrest by generating a Sic1 knockout strain (Figure 1A). In  
105 this strain, we tagged Hog1 with mVenus at its endogenous locus to allow visualization of its  
106 nuclear translocation by microscopy. We also incorporated the same Hog1-mVenus construct in  
107 a wild type (WT) strain to allow for comparison of its Hog1 dynamics with those of the *sic1Δ*  
108 mutant. For precise temporal control in applying a step input of osmotic shock, we used a

109 commercially available microfluidic platform that allowed us to quickly induce osmoshock and  
110 monitor Hog1 dynamics in the *sic1Δ* and WT strains by time lapse microscopy. We chose the  
111 osmolyte sorbitol as the input to induce hyper-osmotic stress because it is an inert sugar in the  
112 presence of glucose <sup>21</sup>.

113       Using this experimental setup, we subjected WT and *sic1Δ* mutant cells to a step input  
114 of 1.2 M sorbitol osmoshock and monitored Hog1 nuclear translocation dynamics. Following the  
115 sorbitol input, Hog1 rapidly translocated to the nucleus in both strains with similar nuclear influx  
116 dynamics (Figure 1B). The degree of maximum nuclear enrichment was virtually  
117 indistinguishable in both strains, suggesting that the mutant maintains the ability to sense and  
118 respond to acute osmotic shock. In the WT strain, Hog1 exited the nucleus and its cytoplasmic  
119 levels adapted to the pre-stimulus values within 45 minutes on average, consistent with  
120 previous reports <sup>20</sup>. Surprisingly, however, the return of Hog1 to the cytoplasm was much faster  
121 in the *sic1Δ* cells, occurring on average within 33 minutes (Figure 1C). This constitutes a  
122 significant 30% speed-up compared to WT (Figure 1C, right). This acceleration of Hog1  
123 adaptation in non-arresting cells was not a sorbitol-specific effect, since experiments carried out  
124 with 0.6 M NaCl also showed the same phenotype (Supplemental Figure 1A, B). The Sic1  
125 protein is known to be a G1-specific regulator<sup>22</sup>. However, since we observe this phenotype  
126 averaged over the entire asynchronous population, we are likely underestimating the effect of its  
127 deletion.

128       The faster Hog1 response in *sic1Δ* cells can be the result of a breakdown of coordination  
129 between the regulatory osmotic response and turgor pressure of the cell. If this were the case,  
130 then Hog1 would recover its cytoplasmic localization without full recovery in other physiological  
131 parameters such as cellular volume and glycerol accumulation necessary for this recovery. On  
132 the other hand, if the fast Hog1 adaptation were the result of an acceleration within an intact

133 recovery program, then the profile of volume recovery and glycerol accumulation should also be  
134 accelerated. We therefore investigated these critical phenotypes to see if the integrity of the  
135 adaptive program is maintained despite accelerated Hog1 dynamics in the *sic1Δ* strain.

136         First, we measured internal glycerol content using a colorimetric assay following a 1.2M  
137 sorbitol input over 60 minutes in both the WT and *sic1Δ* strains (Figure 1D). Using this assay,  
138 we determined that both WT and mutant cells upregulated their glycerol production by  
139 approximately 5-fold at the end of the 60 minutes. However, while the WT cells did not begin to  
140 dramatically upregulate glycerol production until 30 minutes after the onset of stress, *sic1Δ*  
141 began increasing glycerol synthesis only 15 minutes after stress (Figure 1D, inset). In  
142 agreement with this finding, quantification of cellular surface area as a surrogate for volume also  
143 showed a faster recovery for the mutant relative to the WT (Figure 1E). While this volume  
144 recovery phenotype was reproducible, its extent was slightly lower than the Hog1 and glycerol  
145 phenotype, showing ~15% difference between WT and mutant (Figure 1E, right). This could be  
146 due to the difficulty in cell tracking and quantification of surface area, or to a strict upper limit on  
147 the expansion properties of the cell wall<sup>23</sup>. Taken together, the three phenotypes strongly  
148 support the hypothesis that the mutant has the same coordinated osmotic stress response as  
149 the WT type, but with faster dynamics that ensue from the inability of these cells to arrest their  
150 cell cycle during osmotic shock.

## 151 **Glycerol production is accelerated by using internal sources in mutant that lacks cell** 152 **cycle arrest**

153         Because Hog1 translocation, glycerol production and volume all correlate with faster  
154 recovery dynamics in the mutant strain, we next sought to investigate if another cellular process  
155 was fueling the accelerated production of glycerol, the effector molecule for osmotic shock

156 recovery. We hypothesized that in the *sic1Δ* strain, a surplus of carbon material from central  
157 glycolysis could be shunted into glycerol production, thus resulting in heightened glycerol  
158 synthesis.

159         One possible scenario for this to happen is one in which the deletion of Sic1 augments  
160 the ability of cells to import extracellular glucose, resulting in a greater amount of carbon  
161 material entering glycolysis to be directed towards glycerol production. To test this scenario we  
162 performed a mass spectrometry <sup>13</sup>C isotope tracing experiment to compare the external glucose  
163 incorporation rate between the mutant and WT strains. In this experiment, cells were grown in  
164 <sup>12</sup>C glucose media. At time zero, an aliquot of cells was transferred onto filter paper over a  
165 vacuum manifold and continuously perfused with fully-labeled <sup>13</sup>C glucose media with and  
166 without 1.2 M sorbitol for various durations before quenching the sample (Figure 2A,  
167 Supplemental Figure 2A). A pilot experiment (not shown) suggested that turnover rates of  
168 glycolytic intermediates occur on the order of seconds, with intermediates reaching steady-state  
169 after 1 minute. Therefore, we chose to quench samples at 10, 20, 30, 45 and 60 seconds in  
170 order to capture the rate at which the internally <sup>12</sup>C-enriched glycolysis intermediates are  
171 degraded and newly synthesized metabolites incorporate the perfused <sup>13</sup>C. Consistent with a  
172 fast turn-over of these metabolites, we observed a rapid decay of <sup>12</sup>C enrichment among the  
173 glycolysis intermediates within seconds. In the examples of glucose-6-phosphate (G6P) and  
174 fructose bisphosphate (FBP), the *sic1Δ* strain incorporated <sup>13</sup>C with a slower rate than the WT in  
175 the presence and absence of osmotic shock (Figure 2B, Supplemental Figure 2B). Using the  
176 decay rate of <sup>12</sup>C enrichment as a surrogate for extracellular glucose incorporation, we derived  
177 <sup>13</sup>C incorporation rates of 0.117 s<sup>-1</sup> and 0.04 s<sup>-1</sup> for WT and *sic1Δ*, respectively, during osmotic  
178 shock for G6P. Similarly, FBP incorporated <sup>13</sup>C at rates of 0.12 s<sup>-1</sup> and 0.064 s<sup>-1</sup> for WT and  
179 *sic1Δ*, respectively. The approximately 2-to-3-fold slower <sup>13</sup>C incorporation rate in the *sic1Δ*



180 mutant was consistent for all glycolysis intermediates we targeted, from upper glycolysis in G6P  
181 to phosphoenolpyruvate (PEP) in lower glycolysis (Supplemental Figure 2B,C). Therefore, it is  
182 clear that the faster recovery of the *sic1Δ* mutant is unlikely to be ascribed to import of external  
183 glucose, since the mutant is slower at <sup>13</sup>C incorporation.

184         Slower glucose incorporation often has the implication of a reduced doubling rate, which  
185 has been suggested to confer an advantage during stress adaptation <sup>24,25</sup>. We measured the  
186 growth rate of the *sic1Δ* mutant and observed that it has a doubling time of 3.4 hours compared  
187 to 2.1 hours of the WT in defined media (Supplemental Figure 3A). To assess whether slower  
188 growth could be correlated to the accelerated osmohock adaptation, we compared the growth  
189 rate of all strains used in this study (see subsequent sections for different strains, including  
190 those with different deletions in metabolic genes) against their respective adaptation time to an  
191 osmotic shock (Supplemental Figure 3B). We found a weak correlation (R =0.34) between the  
192 growth rate of the strains tested and their adaptation time to osmotic stress, suggesting that  
193 while growth may contribute to the accelerated phenotype, it is unlikely to be the only factor.

194         The difference in external glucose incorporation rates between WT and *sic1Δ* suggest  
195 that the mutant is not importing more extracellular carbon material into glycolysis. To further  
196 investigate the source of its accelerated glycerol production, we reasoned that if the excess  
197 carbon material was not from extracellular sources, then it was conceivable that the glycerol  
198 synthesis in the *sic1Δ* strain could be assisted by diverted intracellular carbon stores. To  
199 investigate this possibility, we again turned to <sup>13</sup>C mass spectrometry isotope tracing to test  
200 whether, and to what extent, intracellular carbon was used for glycerol production in both  
201 strains. In order to selectively enrich internal stores with a unique carbon isotope, we grew the  
202 cells on <sup>12</sup>C glucose, and 5 minutes before time zero, resuspended the cells in fully-labeled <sup>13</sup>C  
203 glucose. We then continued this treatment with and without osmohock (1.2M sorbitol) for the

204 remainder of the experiment, collecting samples until 30 minutes after osmoshock (Figure 2C).  
205 Based on the rapid turn-over of glycolytic intermediates (Supplemental Figure 2B, C), we  
206 reasoned that within 5 minutes all glycolysis intermediates will be  $^{13}\text{C}$  enriched, but  
207 macromolecules such as storage carbohydrates would remain enriched in  $^{12}\text{C}$  due to their  
208 slower turn-over<sup>26,27</sup>. Given that the cell is only provided  $^{13}\text{C}$  carbon at the onset of osmotic  
209 shock, and glycolysis intermediates likely enriched  $^{13}\text{C}$  in the 5 minutes before stress, any  
210 detection of  $^{12}\text{C}$  after HOG activation would implicate the liquidation of an internal  
211 macromolecule.

212 By monitoring the panel of targeted metabolites in glycolysis and glycerol precursors, we  
213 detected low  $^{12}\text{C}$  enrichment along central glycolysis, suggesting that both strains liquidated  
214 internal stores during osmoshock. The dynamic pattern of  $^{12}\text{C}$  enrichment of metabolites for the  
215 WT cells showed a pattern of low and unchanged level (FBP and PEP) or a level that declined  
216 as a function of time (G6P and DHAP) (Figure 2D, Supplemental Figure 4B). The temporal  
217 enrichment dynamics of the *sic1Δ* mutant, however, were markedly different showing a transient  
218 peak of  $^{12}\text{C}$  enrichment (indicating incorporation of internal carbon stores) followed by a  
219 decrease for all metabolites (Figure 2D, Supplemental Figure 4B). In the first step of glycolysis,  
220 the metabolite G6P started with a low  $^{12}\text{C}$  enrichment, which increased and peaked between 1  
221 and 5 minutes and subsequently decreased. The same pattern was present for glycolysis  
222 intermediates FBP and PEP. More importantly, this same transient  $^{12}\text{C}$  signature was present in  
223 the glycerol production branch represented by dihydroxyacetone phosphate (DHAP). This  
224 transient  $^{12}\text{C}$  enrichment pattern in the *sic1Δ* mutant suggests that  $^{13}\text{C}$  in glycolysis  
225 intermediates is temporarily replaced by  $^{12}\text{C}$  from internal stores in a flux that traverses the  
226 metabolic route to glycerol production. However, after this wave, external  $^{13}\text{C}$  is incorporated  
227 again in metabolites, underlying the subsequent decline in  $^{12}\text{C}$  enrichment.

228 It is worth noting that in the absence of stress, the WT had a higher basal  $^{12}\text{C}$  enrichment  
229 across the metabolites targeted, likely due to a higher basal turnover rate of macromolecules,  
230 and consistent with its faster growth rate compared to the *sic1Δ* strain <sup>26</sup>. Only during the onset  
231 of stress did the *sic1Δ* mutant have a brief, higher  $^{12}\text{C}$  enrichment with the aforementioned peak  
232 throughout (Figure 2C, Supplemental Figure 4B). Collectively, these data strongly suggest that,  
233 unlike the WT, *sic1Δ* briefly shunts internal carbon stores as extra flux into glycerol production at  
234 the beginning of osmotic shock.

235 Interestingly, the immediate precursor to glycerol, glycerol-3-phosphate (GL3P), had an  
236 order of magnitude greater proportion of  $^{12}\text{C}$  compared to the other metabolites tested (Figure  
237 2D). The increase in  $^{12}\text{C}$  could be attributed to back-flux from existing  $^{12}\text{C}$ -enriched glycerol by  
238 way of a futile cycle to degrade excess ATP during severe stress <sup>28</sup>. Despite the discrepancy  
239 between GL3P and DHAP, the *sic1Δ* strain was still enriched with a greater amount of  $^{12}\text{C}$  than  
240 the WT, likely reflecting the convergence of the aforementioned futile cycle and internal carbon  
241 liquidation.

#### 242 **Internal glycogen is liquidated using the Gph1 enzyme and shunted into glycerol** 243 **production in mutant that lacks cell cycle arrest**

244 Previous studies have established links between cell cycle progression and central  
245 metabolism as integral to cellular physiology <sup>29-31</sup>. These links are mediated mechanistically  
246 through biochemical interactions where CDK1 (Cdc28) activates storage catabolism enzymes  
247 for trehalose and glycogen (Nth1 and Gph1, respectively) <sup>32,33</sup>. Given these data, we  
248 hypothesized that during osmotic shock, the *sic1Δ* mutant could activate storage catabolism  
249 enzymes through unabated cell cycle progression, resulting in a burst of glycolytic flux that was  
250 then shunted into excess glycerol production (Figure 3A). Further, we predicted that by coupling

251 *sic1Δ* with either a Nth1 or Gph1 knockout, we could rescue the mutant to the WT phenotype,  
252 for example as measured by Hog1 localization dynamics.

253 Cellular trehalose levels have been widely established as mediators of stress recovery  
254 <sup>34</sup>. However, surprisingly, in a *sic1Δnth1Δ* mutant, Hog1 nuclear levels still adapted significantly  
255 faster than in WT following osmotic stress (Supplemental Figure 5A, B), suggesting that  
256 trehalose is not the main liquidated internal carbon source. However, when we coupled the  
257 *sic1Δ* deletion with a knockout of Gph1 (*sic1Δgph1Δ* mutant), Hog1 adapted nearly 30% slower,  
258 closely resembling WT recovery time (Figure 3B, C). When we combined these genetic  
259 perturbations in a *sic1Δnth1Δgph1Δ* strain, Hog1 again adapted in time comparable to WT,  
260 supporting the notion that the Gph1-mediated breakdown of glycogen is the main driver of the  
261 accelerated *sic1Δ* phenotype (Supplemental Figure 5C). To ensure that the *gph1Δ* rescue is  
262 specific to mitigate the effect of *sic1Δ*, and not a broad glycolytic flux perturbation irrespective of  
263 genetic background, we tested whether the absence of Gph1-mediated glycogen breakdown  
264 affected an otherwise WT Hog1 response. Because glycogen catabolism is halted due to  
265 normal cell cycle arrest, *gph1Δ* cells should show a WT adaptation. Indeed, Hog1 adaptation  
266 time following osmostress in *gph1Δ* cells is nearly indistinguishable from the WT response  
267 (Supplemental Fig 5A, B). Consistent with the rescue in Hog1 dynamics, we observed that the  
268 deletion of Gph1 counter-acted the *sic1Δ* effect and reduced the glycerol accumulation at 15  
269 minutes in a manner commensurate to the WT rate (Figure 3D). We attempted to measure  
270 cellular glycogen levels and did not observe a significant difference within the first 15 minutes of  
271 response between strains (data not shown). This is consistent with the notion that potentially  
272 undetectable changes in internal glycogen can be converted to substantial changes in glycerol  
273 content, given the massive polysaccharide nature of glycogen and the 3-carbon composition of  
274 glycerol.

275 **Accelerated recovery due to glycogen storage liquidation during osmotic shock**

276 **prioritizes faster adaptation over robustness to repeated insults**

277           Bypassing cell cycle arrest during osmotic shock results in accelerated recovery due to  
278 cell cycle-mediated carbon flux shunted into glycerol production. This suggests that the *sic1Δ*  
279 mutant might have an advantage upon one instance of osmotic stress. Conceivably, multiple  
280 instances of osmotic shock can amplify the advantage that *sic1Δ* cells have over WT cells.  
281 Alternatively, the faster recovery advantage of *sic1Δ* cells might come at the cost of other  
282 vulnerabilities that are only revealed dynamically <sup>35</sup>.

283           To test the endurance of the *sic1Δ* mutant upon a series of osmotic shocks, we  
284 subjected cells to the same 90 minute step input of 1.2 M sorbitol as before, but followed by  
285 three 45 minute shocks separated by 5 minutes (Figure 4A). At the end of each step input, we  
286 calculated the relative adaptation time using Hog1 nuclear residence as a metric and also  
287 assessed the visible physical characteristics of cells. After the first osmotic shock, both strains  
288 adapt as previously shown, with the *sic1Δ* mutant recovering faster than its WT counterpart  
289 (Figure 4B). Following the first step input, Hog1 adaptation to subsequent osmostress inputs  
290 proceeded faster (around 50% faster in this case) in both WT and mutant strains due to  
291 accumulation of glycerol from the previous cycle and consistent with previous reports <sup>35</sup> (Figure  
292 4C). However, in the subsequent pulses, many *sic1Δ* mutant cells started exhibiting  
293 morphological differences from their WT counterparts. These cells displayed a deflated  
294 phenotype with visible material accumulated in the nearby vicinity, suggesting the cell lysed and  
295 released intracellular debris. This morphology is consistent with a breakdown of cell wall  
296 integrity (Supplemental Video), which is a common mechanism of death in serial osmotic shock  
297 perturbations <sup>23</sup>. Assessment of this phenotype revealed a marked increase in cells that have a  
298 breakdown in their cell wall integrity for each subsequent pulse in *sic1Δ* cells. By the end of the

299 fourth step input of osmotic shock, 25% of *sic1Δ* cells displayed a morphology consistent with a  
300 compromised cell wall, while only 5% of WT cells displayed a similar phenotype (Figure 4D, E).  
301 Interestingly, the *sic1Δgph1Δ* genetic background shares the same acute vulnerability as *sic1Δ*  
302 to repeated osmotic pulses despite its adaptation that resembles that of the WT. However, the  
303 triple mutant *sic1Δnth1Δgph1Δ* is able to recover its morphology after sequential osmoshocks in  
304 a manner that is more similar to the WT (Supplemental Figure 6D). This difference in  
305 responsiveness suggests unique roles for the breakdown of trehalose and glycogen that warrant  
306 further investigation. Nonetheless, it is clear that while the accelerated adaptation ostensibly  
307 provides an advantage in the face of a single step input of osmotic shock, the *sic1Δ* mutant is  
308 severely ill-suited for repeated insults.

## 309 Discussion

310       Alterations in cell cycle dynamics have a fundamental presence in many adaptations to  
311 stress, but a mechanistic understanding of its role has long been outstanding. Here we  
312 attempted to understand some aspects of the role of cell cycle arrest in the context of the  
313 well-studied HOG pathway and associated osmotic stress. Our approach was to decouple the  
314 HOG stress program from the cell cycle machinery and monitor the nuclear localization  
315 dynamics of HOG master effector (Hog1). This experiment revealed that the stereotyped  
316 behavior of Hog1 accelerated when the cell cycle could still proceed during osmoshock. We  
317 confirmed that the HOG program was still competent under these circumstances by measuring  
318 other canonical hallmarks of osmoshock recovery - internal glycerol content and cellular volume.  
319 Observing that both proceed faster in the mutant, we utilized quantitative mass spectrometry to  
320 implicate internal glycogen liquidation by the mutant as a route by which glycerol synthesis

321 increases and mediates faster adaptation to the stress. In strong agreement with this insight,  
322 deletion of the glycogen catabolism enzyme Gph1 in a *sic1Δ* background rescues the Hog1  
323 translocation and glycerol accumulation phenotypes. Intrigued by the observation that the WT is  
324 not optimized with respect to the speed of its recovery, we hypothesized that the mutant, which  
325 has faster dynamics, might have vulnerabilities that the WT can circumvent. Following this  
326 reasoning, we identified a critical failure mode of the mutant by subjecting it to multiple step  
327 inputs of osmotic shock. The mutant adapts faster and recovers its basal morphology after the  
328 first osmotic shock, but trades its faster initial adaptation for a compromised cell wall in  
329 subsequent osmoshocks. Meanwhile, the WT adapts slower after the initial osmotic shock, but  
330 maintains nearly 95% consistent physical traits throughout the experiment, thus highlighting the  
331 dichotomy between apparent short-term gain versus long-term resilience against a dynamic  
332 environment.

333         We believe that the main contribution of this work is two-fold. First, our investigations  
334 provide a higher resolution dissection of the interconnection between three crucial cellular  
335 pathways: the cell cycle, the HOG stress response, and carbon metabolism. Contrary to  
336 expectation, this connection is not perfectly tuned to maximize the speed of adaptation to stress.  
337 In fact, the connection of the HOG pathway to the cell cycle diminishes the ability of the cell to  
338 recover rapidly following osmostress, and ablation of this connection allows the cell to recover a  
339 substantial 30% faster. The cell cycle seems to be the gatekeeper of a metabolic valve that can  
340 augment carbon flow into glycerol from internal resources, but this valve remains shut in WT  
341 cells. Opening of this valve in mutant (*sic1Δ*) cells seems to mediate their faster recovery, as  
342 evidenced by a *gph1Δ* mutant in which deletion of the enzyme presiding over the internal flux  
343 from glycogen to glycerol abolishes the fast osmostress recovery. Therefore, our data provide

344 additional mechanistic details to an intricate interplay of pathways that together set the cellular  
345 recovery tempo.

346         The second contribution of this work is to formulate an instance in which cells seem to  
347 navigate a delicate functional balance, sacrificing the brief advantage of faster recovery from an  
348 insult for robustness to future environmental changes (Figure 4F). This is perhaps a prompt to  
349 revise our view of how to interpret the measured dynamics of stress responses and our  
350 assumptions about how cells mobilize their resources to combat stress. It is clear that at least in  
351 the example of osmostress, *S. cerevisiae* cells do not maximally mobilize their internal carbon  
352 sources to combat the stress, and hence sacrifice substantial speed in their recovery. It is also  
353 evident that the cell cycle serves as an arbiter and enforcer of this suboptimal performance.  
354 Since the mutant that evades the speed limitation shows tremendous vulnerability to repeated  
355 stress, one is compelled to at least hypothesize that this cell cycle control has evolved to  
356 alleviate such vulnerability in an environment where repeated or oscillating stress might be more  
357 probable.

358         The work presented here reframes cell cycle arrest in a mechanistic light as being a  
359 mediator of a slower adaptation response to hyperosmotic shock. In future investigations, it  
360 would be interesting to use a similar approach with conditional or inducible mutants to test for  
361 the role of cell cycle arrest in other stresses, potentially discovering similar metabolic flux control  
362 mechanisms or roles more tailored to specific stresses. Alternatively, expanding the scope of  
363 this question to higher eukaryotes could further illuminate the complex relationship between cell  
364 cycle, metabolism and stress response, which has been implicated in several pathologies<sup>36</sup>.  
365 More broadly, it is clear that as we begin to explore how multiple pathways collaborate to allow a  
366 cell to navigate its complex environment, we need to revisit statements about functional  
367 allocations and re-explore plausible but exceedingly simple assignment of roles and



368 assumptions of unifunctional optimality of any one pathway. We hope that the data presented in  
369 this work help to form a basis for such investigations, initiated by our quantitative exploration of  
370 the ubiquitous role that cell cycle arrest plays in stress adaptation.

## 371 Materials and Methods

### 372 Strain Construction

373 The base *S. cerevisiae* strain used in this study is w303. Hog1-mVenus at the  
374 endogenous locus was generated by ordering oligos of 40 bp homology 5' upstream and 40 bp  
375 homology downstream of the stop codon, PCR amplifying the mVenus-HIS3 cassette, and  
376 transforming as previously described<sup>37</sup>. To knockout genes, 80 bp of homology 5' to the start  
377 codon and 3' of the stop codon was used to PCR amplify a selection marker cassette and  
378 transformed as described above. PCR products using oligos in the 5' UTR and internal to the  
379 selection cassette were used to verify knockouts and insertions.

| Name    | Background | Genotype                                                      | Description                                      |
|---------|------------|---------------------------------------------------------------|--------------------------------------------------|
| yARB001 | w303a      | <i>HOG1-mVenus-HIS3</i>                                       | "Wild type" strain                               |
| yARB002 | w303a      | <i>HOG1-mVenus-HIS3,SIC1::TRP1</i>                            | <i>sic1</i> Δ strain                             |
| yARB003 | w303a      | <i>HOG1-mVenus-HIS3,SIC1::TRP1,<br/>NTH1::NAT</i>             | <i>sic1</i> Δ <i>nth1</i> Δ strain               |
| yARB004 | w303a      | <i>HOG1-mVenus-HIS3,SIC1::TRP1,<br/>GPH1::LEU2</i>            | <i>sic1</i> Δ <i>gph1</i> Δ strain               |
| yARB005 | w303a      | <i>HOG1-mVenus-HIS3,SIC1::TRP1,<br/>GPH1::LEU2, NTH1::NAT</i> | <i>sic1</i> Δ <i>nth1</i> Δ <i>gph1</i> Δ strain |

|         |       |                                     |                     |
|---------|-------|-------------------------------------|---------------------|
| yARB006 | w303a | <i>HOG1-mVenus-HIS3, GPH1::LEU2</i> | <i>gph1Δ</i> strain |
|---------|-------|-------------------------------------|---------------------|

### 380 Growth Conditions

381 Single colonies were picked and inoculated from auxotrophic SD (6.7 g/L Bacto-yeast  
382 nitrogen base without amino acids, 2 g/L complete amino acid mix, and 20 g/L dextrose) agar  
383 plates. SDC liquid media used throughout the study consisted of 6.7 g/L Bacto-yeast nitrogen  
384 base, 2 g/L complete amino acid mix, and 20 g/L dextrose.

### 385 Microscopy

386 Time-lapse microscopy was collected on a Nikon Ti inverted scope 40x air objective,  
387 with Sutter XL lamp illumination and a Hamamatsu Flash 4.0 camera. YFP (515 ex/528 em)  
388 channel was collected using a Chroma CFP/YFP filter set with an exposure time of 300 ms.  
389 Automated image acquisition was controlled by Nikon NIS Elements proprietary software. The  
390 CellAsics Onix2 Microfluidic platform was used to control the changing of media. Pressure of the  
391 media perfusion was held constant at 10.8 kPa in a microfluidic plate designed to trap haploid  
392 yeast (Millipore). To ensure that the yeast cells adapted to conditions within the microfluidic  
393 chamber, cells were perfused with normal SDC media for 90 minutes prior to the osmotic shock  
394 in all experiments.

### 395 Image Processing

396 The nucleus of each cell was defined as the mean pixel intensity of the brightest 5% of  
397 pixels over the segmented cell in the YFP channel. The remainder of the segmented cell outside  
398 the brightest 5% was defined as the cytoplasm. Cell tracking and quantification of  
399 nuclear/cytoplasmic enrichment was done using automated yeast cell tracking software  
400 implemented in Matlab<sup>38</sup>. Nuclear enrichment is plotted as the population average nuclear to  
401 cytoplasmic ratio divided by the average three time points before the onset of osmotic shock

402 minus one, as previously described<sup>18</sup>. Cellular volume was calculated from segmentation of an  
403 out of focus brightfield image using the Nucleaizer web interface ([www.nucleaizer.com](http://www.nucleaizer.com)). The  
404 surface area of each cell in pixels was then converted into an approximate volume as described  
405 previously<sup>18</sup>. This volume was normalized by the three time points before the onset of osmotic  
406 shock.

#### 407 Mass Spectrometry

408 Samples were grown overnight to saturation and diluted in SDC media. Cultures were  
409 grown to mid-log and 1 mL was transferred to a 0.45 µm PVDF membrane filter paper  
410 (Millipore), fixed atop a vacuum manifold. Cells were continuously perfused with either normal  
411 SDC media or 1.2 M sorbitol in SDC media for the indicated durations (Figure 2A). At the end of  
412 the perfusion period, the filter paper containing cells was immediately transferred to a 2 mL  
413 quenching solution of 40:40:20 Methanol:Acetonitrile:H<sub>2</sub>O chilled to -20 °C. After 2 hours  
414 incubation at -20 °C, quenching solution plus cells was transferred to a conical tube and dried  
415 for approximately 7 hours *in vacuo* and resuspended in 45 µL H<sub>2</sub>O.

416 In the experiment described in Figure 2C, five minutes prior to time zero 50 mL culture  
417 were transferred to a conical tube, spun down at 2000 RPM for 2 minutes and resuspended in  
418 25 mL fully labeled <sup>13</sup>C glucose SDC. After time zero, at the indicated time points, 1 mL of  
419 culture was transferred to the same filter paper vacuum manifold described above, and after  
420 media washed through the sample was quenched as described above.

421 Collected compounds were analyzed using an LC-MS/MS mass spectrometer system  
422 consisting of a 1290 Infinity LC (Agilent Technologies) coupled to a 5500 QTRAP triple  
423 quadrupole mass spectrometer (AB Sciex) in negative mode and with multiple reaction  
424 monitoring (MRM) scan type. Five µL of metabolite extracts were injected on an Agilent  
425 Poroshell 120 HILIC-Z column (150 x 2.1 mm, 2.7 µm; Agilent, Santa Clara, CA) using a mobile

426 phase A (water, 10 mM ammonium acetate, 5  $\mu$ M medronic acid, pH 9) and mobile phase B  
427 (90% acetonitrile, 10% water, 10 mM ammonium acetate, 5  $\mu$ M medronic acid, pH 9) at a  
428 constant flow rate of 250  $\mu$ L/min; Initial conditions: 10% A, 2 min: 10% A, 12 min: 40% A, 15 min:  
429 40% A, 16 min: 10% A, 24 min: 10% A. The MRM settings were adapted from Yuan et al <sup>39</sup>. The  
430 raw data were processed and analyzed using custom software in Matlab (Mathworks), and <sup>13</sup>C  
431 fractional labeling was corrected for natural abundance of <sup>13</sup>C isotopes as previously described  
432 <sup>40</sup>.

### 433 Intracellular glycerol assay

434 Each strain was inoculated into SDC media, grown overnight at 30 °C, split and diluted  
435 into six 600  $\mu$ L 0.1 OD600 cultures in a 96 well 2 mL plate. Once the cells were in log phase  
436 growth, 600  $\mu$ L of 2.4 M sorbitol was added to one well at time points of 60 minutes, 30 minutes,  
437 15 minutes, 10 minutes, 5 minutes and 0 minutes. After time zero, 200  $\mu$ L of each culture was  
438 transferred to a separate Corning 3904 96-well assay plate for an OD600 reading, and the  
439 remaining 1 mL immediately spun down for 2 minutes at 2000 RPM. Cells were washed in 400  
440  $\mu$ L H<sub>2</sub>O, and spun down again for 2 minutes at 2000 RPM. The culture was then resuspended in  
441 150  $\mu$ L H<sub>2</sub>O, and left to incubate for 15 minutes at 95 °C. Following incubation at 95 °C, cells  
442 were vortexed for 2 minutes and promptly spun down for 10 minutes at 4000 RPM. After the  
443 pelleting of cell debris, 100  $\mu$ L of supernatant was carefully removed and transferred to a  
444 separate plate and kept at 4 °C. Colorimetric glycerol assays were acquired using a commercial  
445 kit (Sigma) where the provided assay powder was resuspended in 40 mL of distilled H<sub>2</sub>O. For  
446 each sample, 5  $\mu$ L of supernatant was added to 400  $\mu$ L of glycerol free reagent solution, and left  
447 to incubate at room temperature for 15 minutes hidden from light. After 15 minutes, 200  $\mu$ L of  
448 the glycerol free reagent solution-sample mixture was transferred to a separate plate and the  
449 OD540 was acquired for each sample on a Tecan Spark 10M plate reader. To account for

450 differences in cell density across samples, the 540 nm readings were normalized by their OD  
451 600 nm reading values.

#### 452 Growth Assay

453 Each strain was inoculated into SDC media overnight, reached saturation and diluted the  
454 following morning to an OD600 of 0.1. After dilution, 200  $\mu$ L of culture was transferred to a  
455 Corning 3904 96-well assay plate and grown at 30 °C while shaking. Optical density readings  
456 were collected at 600 nm every 20 minutes until saturation on a Tecan Spark 10M plate reader.

#### 457 Cell Morphology Quantification

458 At the end of each 45 minute step input of osmotic shock, each cell was manually  
459 assessed for cell cycle re-entry and return to basal morphology. Cells that either did not show  
460 continued cell cycle progression, or displayed a visible change in refractive index reflective of a  
461 change in morphology were labeled with altered morphology.

#### 462 Main Figure Captions:

463 **Figure 1: Removing cell cycle arrest by deletion of Sic1 accelerates the HOG adaptation**  
464 **program during osmotic shock.** A) A simplified schematic of the HOG pathway showing its  
465 coupling to cell cycle arrest and glycerol production. In a cell cycle mutant strain *sic1 $\Delta$* , we  
466 asked whether the removal of stress-induced cell cycle arrest affects the adaptive response. B)  
467 Representative time lapse images of endogenously-tagged Hog1-mVenus following step input  
468 of 1.2 M sorbitol osmotic shock to WT (top) and *sic1 $\Delta$*  (bottom) cells. Quantification of all cells  
469 presented in Panel C. C) Top: Cartoon depicting the translocation dynamics and quantification  
470 of adaptation time. Bottom: Quantification of the WT (blue) and *sic1 $\Delta$*  (orange) Hog1-mVenus  
471 nuclear enrichment in the experiment described in Panel B. Shaded regions represent the  
472 standard error of the mean (SEM) of n=3 biological replicates. Right: Quantification of Hog1

473 adaptation for WT (blue) and *sic1Δ* (orange). Values are normalized to the average of WT. Error  
474 bars represent the SEM of n=3 biological replicates. \*P-value<0.05; two-sided Student's *t*-test.  
475 D) Top: Cartoon schematic depicting the intracellular accumulation of glycerol. Bottom:  
476 Quantification of internal glycerol as a function of time for WT (blue) and *sic1Δ* (orange) to a  
477 step input of 1.2 M sorbitol osmotic shock. Measurements are taken using a colorimetric assay.  
478 Error bars represent the standard deviation for n=3 biological replicates. Inset: the change in  
479 glycerol, calculated as the difference between two time points for data in Panel D, is plotted as a  
480 function of time. \*P-value<0.05; two-sided Student's *t*-test. E) Top: Cartoon schematic depicting  
481 volume recovery and quantification of its adaptation time. Bottom: Change in volume of the WT  
482 (blue) and *sic1Δ* (orange) strains in response to a step input of 1.2 M sorbitol osmotic shock.  
483 Shaded regions represent the SEM of n=4 biological replicates. Right: Quantification of volume  
484 adaptation time of WT (blue) and *sic1Δ* (orange) volume. Values are normalized to the average  
485 of WT. Error bars represent the SEM of n=4 biological replicates.

486 **Figure 2: An internal carbon store is shunted towards excess glycerol production during**  
487 **osmotic shock in the *sic1Δ* mutant.** A) Cartoon schematic of the experiment to measure  
488 extracellular glucose incorporation rates. Cells were inoculated overnight, diluted and outgrown  
489 in <sup>12</sup>C glucose. At time zero a 1 mL sample of cells was transferred to filter paper above a  
490 vacuum manifold and continuously perfused with fully-labeled <sup>13</sup>C glucose media. A 1.2 M  
491 sorbitol input was also administered at time 0. Samples were taken at 10 s, 20 s, 30 s, 45 s, and  
492 60 s and transferred to quenching solution. B) <sup>12</sup>C enrichment over time of central glycolysis  
493 metabolite glucose-6-phosphate (G6P) (Left) and fructose bisphosphate (FBP) (Right). Traces  
494 shown are WT (blue) and *sic1Δ* (orange) strains for experiment described in Panel A. Error bars  
495 represent the standard deviation of n=2 technical replicates. C) Cartoon schematic of

496 experiment to test internal carbon enrichment of targeted metabolites. Cells were inoculated  
497 overnight, diluted and outgrown in  $^{12}\text{C}$  glucose. Five minutes prior to time zero, cells were  
498 resuspended in fully-labeled  $^{13}\text{C}$  glucose. At time zero the culture was diluted 1:1 with 2.4 M  
499 sorbitol in fully-labeled in  $^{13}\text{C}$  glucose. At the indicated time points, 1 mL of culture was placed  
500 on filter paper above a vacuum manifold for the media to wash through, transferred to  
501 quenching solution and then measured. D)  $^{12}\text{C}$  enrichment over time for a panel of select  
502 metabolites in glycolysis and glycerol production. Traces shown are the WT (blue) and *sic1Δ*  
503 (orange) strains for experiment described in Panel C. Error bars represent the standard  
504 deviation of n=2 technical replicates.

505 **Figure 3: Glycogen catabolism enzyme Gph1 mediates expedited glycerol synthesis to**  
506 **fuel acceleration phenotype in *sic1Δ* mutant.** A) Schematic depicting the hypothesis that  
507 liquidation of glycogen by activation of Gph1 accelerates the Hog1-mediated glycerol  
508 production. B) Left: Traces of Hog1 nuclear enrichment over time following 1.2 M sorbitol  
509 osmotic shock in the WT (blue), *sic1Δ* (orange), *sic1Δgph1Δ* (purple) cells. Shaded regions  
510 represent the SEM of n=3 biological replicates. C) Quantification of adaptation time of Hog1  
511 nuclear enrichment computed as in Figure 1B. Values are normalized to the average WT. Error  
512 bars represent the SEM of n=3 biological replicates. \*P<0.05; two-sided Student's *t*-test. D)  
513 Measurement of internal glycerol over time for the strains shown in Panel B in response to a  
514 step input of 1.2 M sorbitol osmotic shock. Measurements are taken using a colorimetric assay.  
515 Inset: the change in glycerol, calculated as the difference between two time points for data in  
516 Panel D, is plotted as a function of time. Error bars represent the standard deviation for n=3  
517 biological replicates.

518 **Figure 4: Cell cycle arrest mediates tradeoffs between fast recovery and resilience to**  
519 **multiple instances of osmotic shock.** A) Top: experiment schematic representing a series of  
520 1.2 M sorbitol osmotic shock step inputs. The first input lasts for 90 minutes and subsequent  
521 inputs last 45 minutes, and are separated by 5 minutes. B) Time traces of Hog1 nuclear  
522 enrichment of WT (blue), *sic1Δ* (orange). Shaded regions represent the SEM of n=3 biological  
523 replicates. C) Quantification of adaptation time of Hog1 nuclear enrichment for WT and *sic1Δ*  
524 strains for data presented in Panel B. Values are normalized to the average first response for  
525 the WT strain. Error bars represent the SEM of n=3 biological replicates. D) The percent of cells  
526 with altered morphological phenotypes at the end of each step input of 1.2 M sorbitol. Error bars  
527 represent the SEM of n=3 biological replicates. \*\*P<0.005; two-sided Student's *t*-test.  
528 E) Representative brightfield images corresponding to the timepoints quantified in Panel D.  
529 Images depict the compromised cell wall morphology indicated by red arrows in the WT (top)  
530 and *sic1Δ* (bottom) strains. F) Conceptual model of the role of cell cycle arrest in hyperosmotic  
531 shock response.

## 532 Author Contributions

533 A.R.B. and H.E-.S. conceived of the study. A.R.B., K.K., and M.D. collected and processed data.  
534 A.R.B., K.K., and H.E-.S. interpreted results. A.R.B. and H.E-.S. wrote and edited the  
535 manuscript with input from all authors.



## 536 Acknowledgements

537 The authors thank the members of the El-Samad lab, Joe DeRisi (UCSF) and Sophie  
538 Dumont (UCSF) for helpful feedback and discussions. The authors also thank Uwe Sauer (ETH  
539 Zürich) for reagents, and DeLaine Larsen and Kari Herrington (UCSF Nikon Imaging Center) for  
540 microscope assistance. H.E.-S. is an investigator in the Chan Zuckerberg Biohub and this work  
541 was supported by the CZ-Biohub gift. This work was also supported by NIH grant  
542 R01GM119033 awarded to H.E.-S. and the National Defense Science & Engineering Graduate  
543 (NDSEG) Fellowship awarded to A.R.B.

## 544 References

- 545 1. Berry, D. B. & Gasch, A. P. Stress-activated Genomic Expression Changes Serve a  
546 Preparative Role for Impending Stress in Yeast. *Molecular Biology of the Cell* vol. 19  
547 4580–4587 (2008).
- 548 2. Gasch, A. P. *et al.* Genomic expression programs in the response of yeast cells to  
549 environmental changes. *Mol. Biol. Cell* **11**, 4241–4257 (2000).
- 550 3. Hohmann, S. & Mager, W. H. *Yeast Stress Responses*. (Springer Science & Business  
551 Media, 2007).
- 552 4. Hao, N. & O’Shea, E. K. Signal-dependent dynamics of transcription factor translocation  
553 controls gene expression. *Nat. Struct. Mol. Biol.* **19**, 31–39 (2011).
- 554 5. Lin, Y., Sohn, C. H., Dalal, C. K., Cai, L. & Elowitz, M. B. Combinatorial gene regulation by  
555 modulation of relative pulse timing. *Nature* **527**, 54–58 (2015).
- 556 6. Lew, D. J. & Reed, S. I. A cell cycle checkpoint monitors cell morphogenesis in budding

- 557 yeast. *J. Cell Biol.* **129**, 739–749 (1995).
- 558 7. Moreno-Torres, M., Jaquenoud, M. & De Virgilio, C. TORC1 controls G1–S cell cycle  
559 transition in yeast via Mpk1 and the greatwall kinase pathway. *Nature Communications* vol.  
560 6 (2015).
- 561 8. Rowley, A., Johnston, G. C., Butler, B., Werner-Washburne, M. & Singer, R. A. Heat  
562 shock-mediated cell cycle blockage and G1 cyclin expression in the yeast *Saccharomyces*  
563 *cerevisiae*. *Mol. Cell. Biol.* **13**, 1034–1041 (1993).
- 564 9. Bellí, G., Garí, E., Aldea, M. & Herrero, E. Osmotic stress causes a G1 cell cycle delay and  
565 downregulation of Cln3/Cdc28 activity in *Saccharomyces cerevisiae*. *Mol. Microbiol.* **39**,  
566 1022–1035 (2001).
- 567 10. Yano, K. *et al.* Mih1/Cdc25 is negatively regulated by Pkc1 in *Saccharomyces cerevisiae*.  
568 *Genes Cells* **18**, 425–441 (2013).
- 569 11. Escoté, X., Zapater, M., Clotet, J. & Posas, F. Hog1 mediates cell-cycle arrest in G1 phase  
570 by the dual targeting of Sic1. *Nat. Cell Biol.* **6**, 997–1002 (2004).
- 571 12. Clotet, J. *et al.* Phosphorylation of Hsl1 by Hog1 leads to a G2 arrest essential for cell  
572 survival at high osmolarity. *EMBO J.* **25**, 2338–2346 (2006).
- 573 13. Ho, Y.-H., Shishkova, E., Hose, J., Coon, J. J. & Gasch, A. P. Decoupling Yeast Cell  
574 Division and Stress Defense Implicates mRNA Repression in Translational Reallocation  
575 during Stress. *Curr. Biol.* **28**, 2673–2680.e4 (2018).
- 576 14. Chasman, D. *et al.* Pathway connectivity and signaling coordination in the yeast  
577 stress-activated signaling network. *Mol. Syst. Biol.* **10**, 759 (2014).
- 578 15. Zid, B. M. & O’Shea, E. K. Promoter sequences direct cytoplasmic localization and  
579 translation of mRNAs during starvation in yeast. *Nature* **514**, 117–121 (2014).
- 580 16. Saito, H. & Posas, F. Response to hyperosmotic stress. *Genetics* **192**, 289–318 (2012).

- 581 17. Hohmann, S. Osmotic stress signaling and osmoadaptation in yeasts. *Microbiol. Mol. Biol.*  
582 *Rev.* **66**, 300–372 (2002).
- 583 18. Muzzey, D., Gómez-Urbe, C. A., Mettetal, J. T. & van Oudenaarden, A. A systems-level  
584 analysis of perfect adaptation in yeast osmoregulation. *Cell* **138**, 160–171 (2009).
- 585 19. Mettetal, J. T., Muzzey, D., Gómez-Urbe, C. & van Oudenaarden, A. The frequency  
586 dependence of osmo-adaptation in *Saccharomyces cerevisiae*. *Science* **319**, 482–484  
587 (2008).
- 588 20. Granados, A. A. *et al.* Distributing tasks via multiple input pathways increases cellular  
589 survival in stress. *Elife* **6**, (2017).
- 590 21. Quain, D. E. & Boulton, C. A. Growth and metabolism of mannitol by strains of  
591 *Saccharomyces cerevisiae*. *J. Gen. Microbiol.* **133**, 1675–1684 (1987).
- 592 22. Verma, R. *et al.* Phosphorylation of Sic1p by G1 Cdk required for its degradation and entry  
593 into S phase. *Science* **278**, 455–460 (1997).
- 594 23. Banavar, S. P. *et al.* Mechanical feedback coordinates cell wall expansion and assembly in  
595 yeast mating morphogenesis. *PLoS Comput. Biol.* **14**, e1005940 (2018).
- 596 24. Blank, L. M. & Sauer, U. TCA cycle activity in *Saccharomyces cerevisiae* is a function of the  
597 environmentally determined specific growth and glucose uptake rates. *Microbiology* **150**,  
598 1085–1093 (2004).
- 599 25. Lu, C., Brauer, M. J. & Botstein, D. Slow growth induces heat-shock resistance in normal  
600 and respiratory-deficient yeast. *Mol. Biol. Cell* **20**, 891–903 (2009).
- 601 26. Suarez-Mendez, C. A. *et al.* Interaction of storage carbohydrates and other cyclic fluxes  
602 with central metabolism: A quantitative approach by non-stationary C metabolic flux  
603 analysis. *Metab Eng Commun* **3**, 52–63 (2016).
- 604 27. Yuan, J., Bennett, B. D. & Rabinowitz, J. D. Kinetic flux profiling for quantitation of cellular

- 605 metabolic fluxes. *Nat. Protoc.* **3**, 1328–1340 (2008).
- 606 28. Blomberg, A. Metabolic surprises in *Saccharomyces cerevisiae* during adaptation to saline  
607 conditions: questions, some answers and a model. *FEMS Microbiology Letters* vol. 182 1–8  
608 (2000).
- 609 29. Özsezen, S. *et al.* Inference of the High-Level Interaction Topology between the Metabolic  
610 and Cell-Cycle Oscillators from Single-Cell Dynamics. *Cell Syst* **9**, 354–365.e6 (2019).
- 611 30. Papagiannakis, A., Niebel, B., Wit, E. C. & Heinemann, M. Autonomous Metabolic  
612 Oscillations Robustly Gate the Early and Late Cell Cycle. *Mol. Cell* **65**, 285–295 (2017).
- 613 31. Tu, B. P., Kudlicki, A., Rowicka, M. & McKnight, S. L. Logic of the yeast metabolic cycle:  
614 temporal compartmentalization of cellular processes. *Science* **310**, 1152–1158 (2005).
- 615 32. Ewald, J. C., Kuehne, A., Zamboni, N. & Skotheim, J. M. The Yeast Cyclin-Dependent  
616 Kinase Routes Carbon Fluxes to Fuel Cell Cycle Progression. *Mol. Cell* **62**, 532–545  
617 (2016).
- 618 33. Zhao, G., Chen, Y., Carey, L. & Futcher, B. Cyclin-Dependent Kinase Co-Ordinates  
619 Carbohydrate Metabolism and Cell Cycle in *S. cerevisiae*. *Molecular Cell* vol. 62 546–557  
620 (2016).
- 621 34. Nwaka, S. & Holzer, H. Molecular biology of trehalose and the trehalases in the yeast  
622 *Saccharomyces cerevisiae*. *Prog. Nucleic Acid Res. Mol. Biol.* **58**, 197–237 (1998).
- 623 35. Mitchell, A., Wei, P. & Lim, W. A. Oscillatory stress stimulation uncovers an Achilles heel of  
624 the yeast MAPK signaling network. *Science* vol. 350 1379–1383 (2015).
- 625 36. Jones, R. G. & Thompson, C. B. Tumor suppressors and cell metabolism: a recipe for  
626 cancer growth. *Genes Dev.* **23**, 537–548 (2009).
- 627 37. Lee, S., Lim, W. A. & Thorn, K. S. Improved blue, green, and red fluorescent protein  
628 tagging vectors for *S. cerevisiae*. *PLoS One* **8**, e67902 (2013).

- 629 38. Doncic, A., Eser, U., Atay, O. & Skotheim, J. M. An algorithm to automate yeast  
630 segmentation and tracking. *PLoS One* **8**, e57970 (2013).
- 631 39. Yuan, M., Breitkopf, S. B., Yang, X. & Asara, J. M. A positive/negative ion-switching,  
632 targeted mass spectrometry-based metabolomics platform for bodily fluids, cells, and fresh  
633 and fixed tissue. *Nat. Protoc.* **7**, 872–881 (2012).
- 634 40. Midani, F. S., Wynn, M. L. & Schnell, S. The importance of accurately correcting for the  
635 natural abundance of stable isotopes. *Anal. Biochem.* **520**, 27–43 (2017).

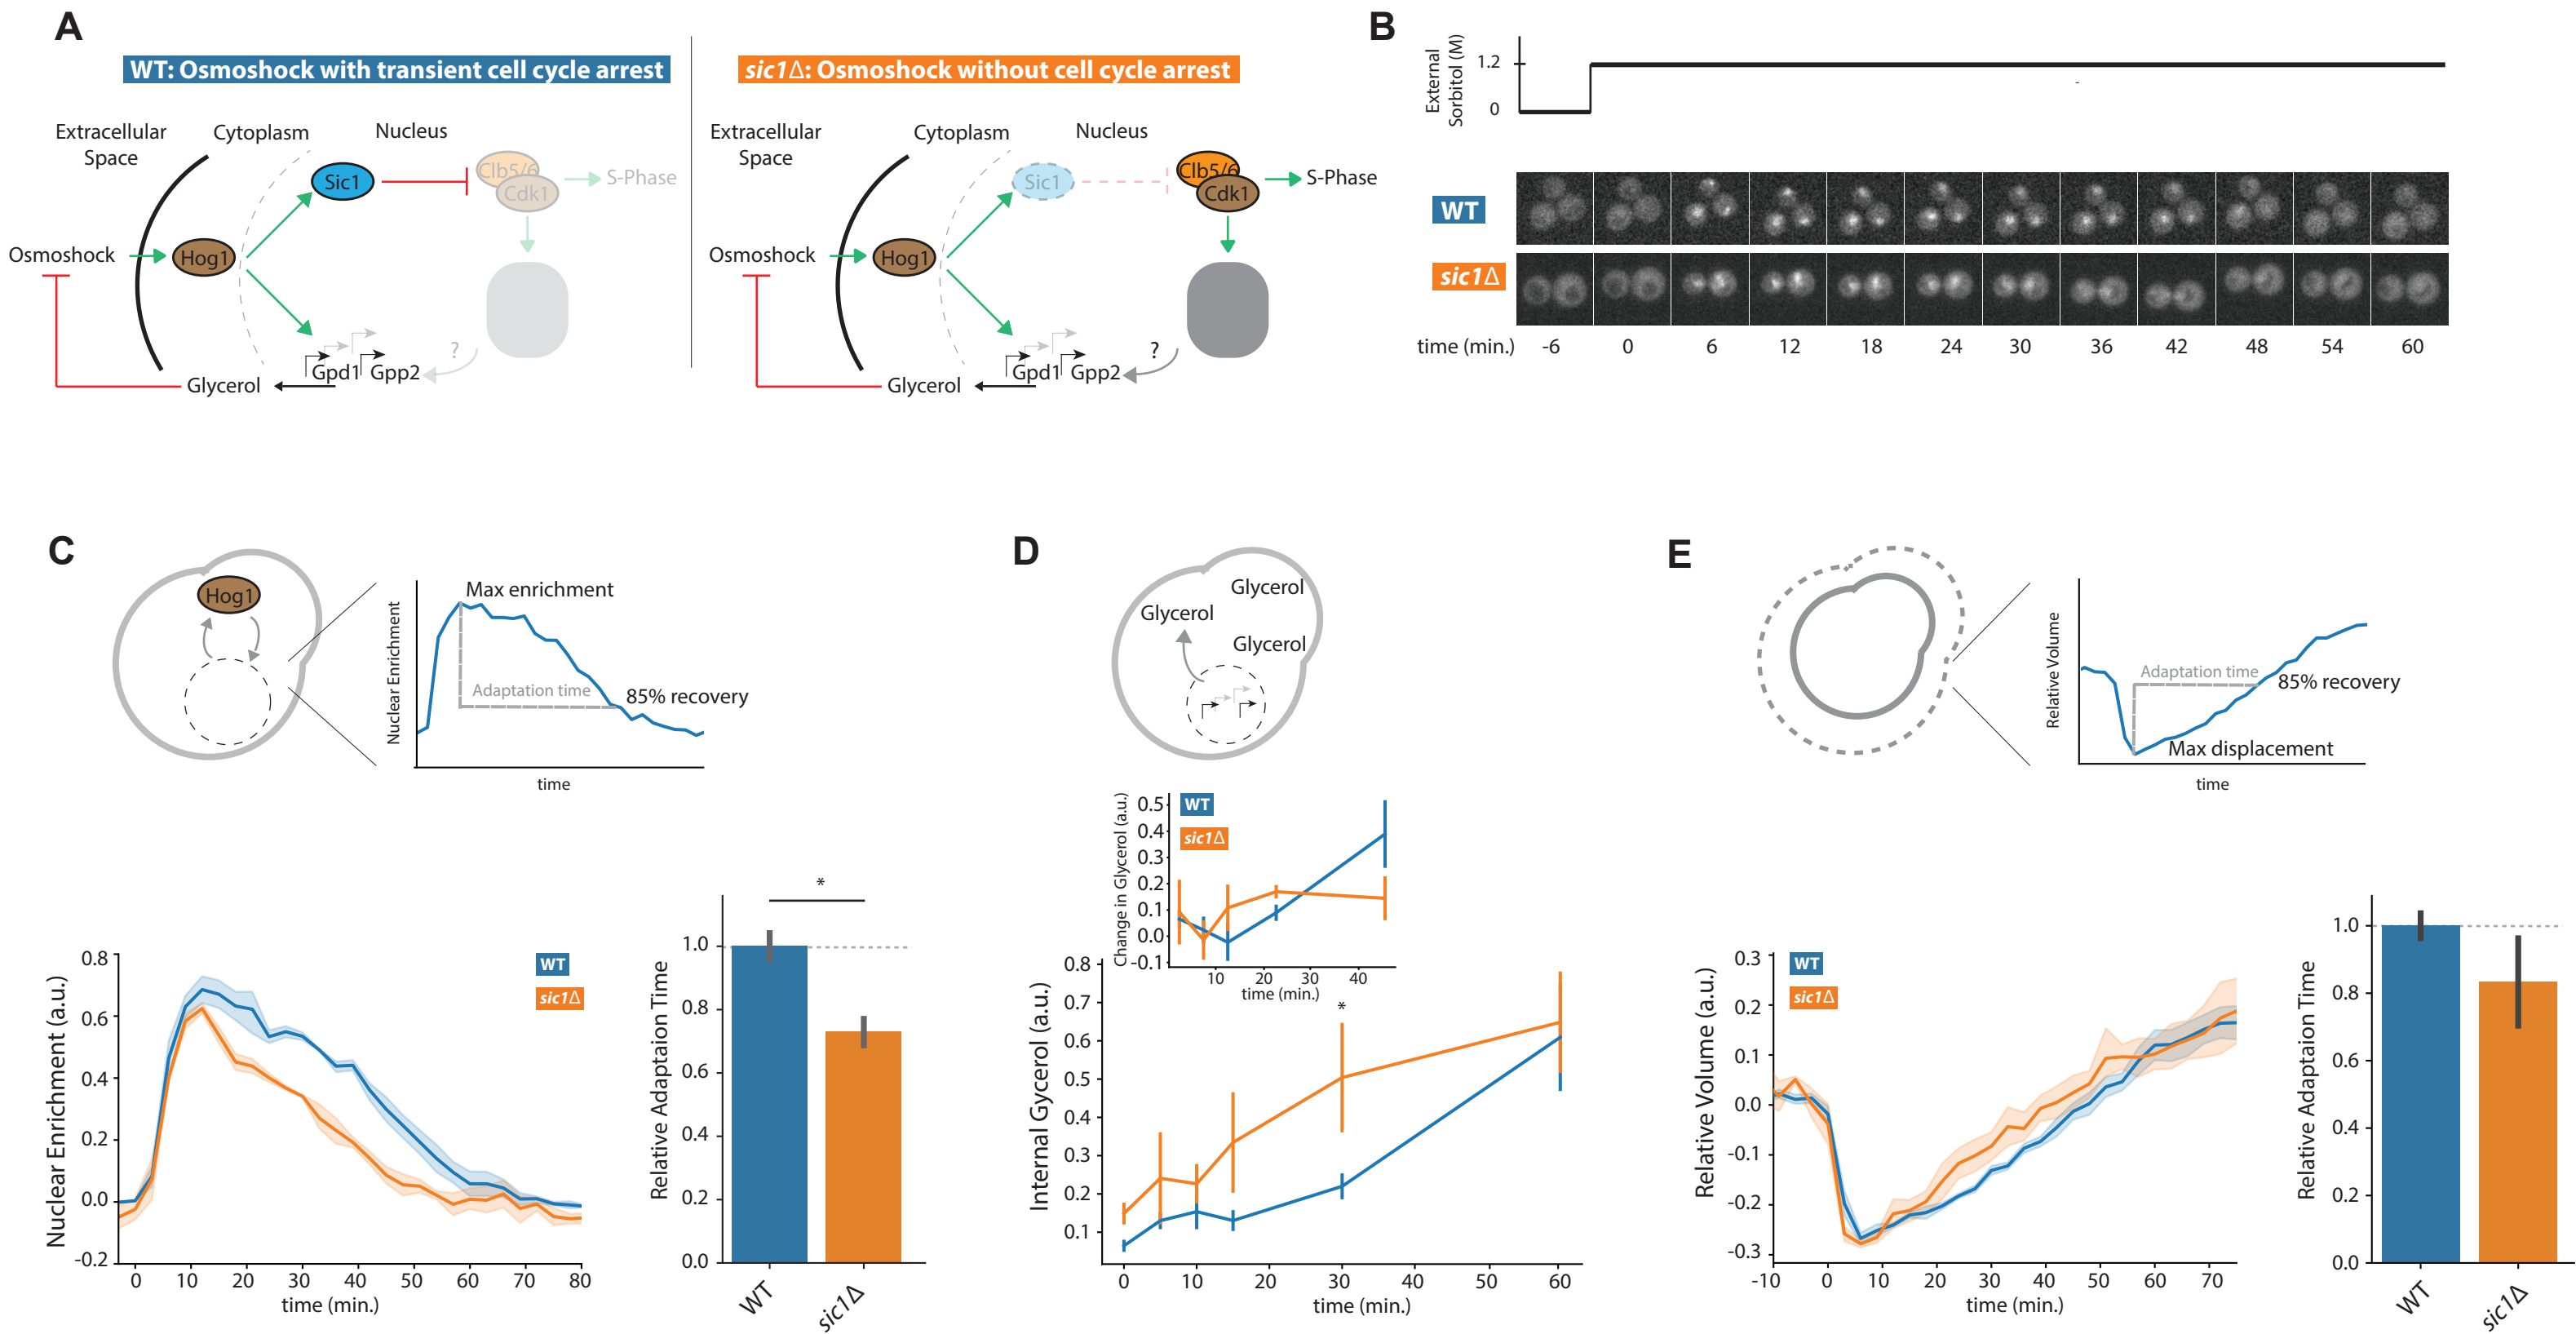

Figure 1

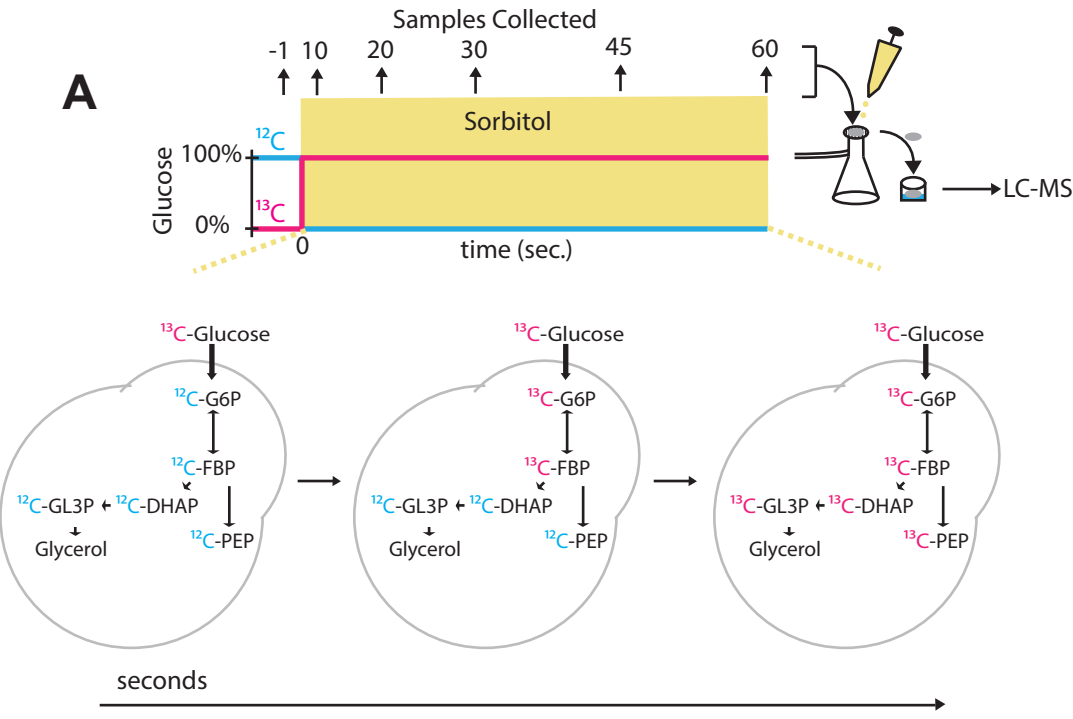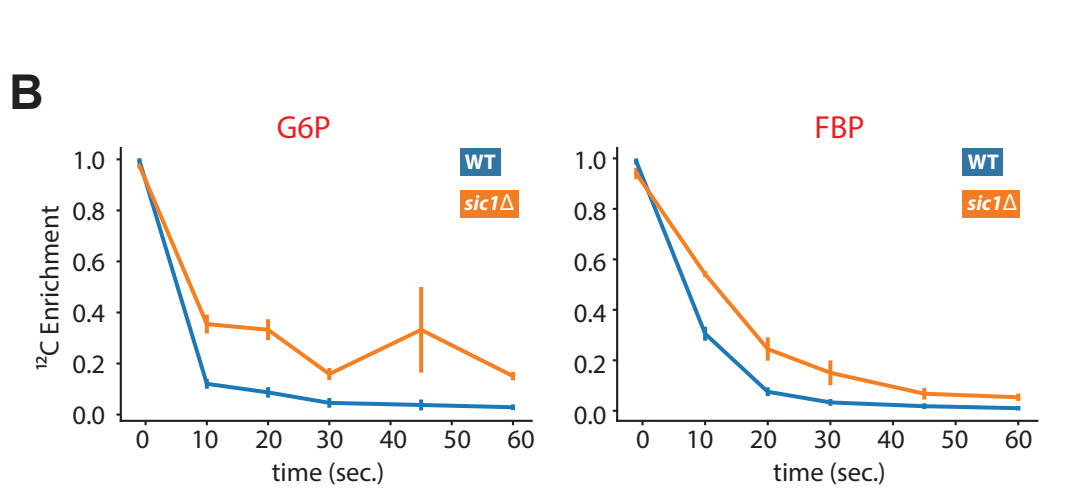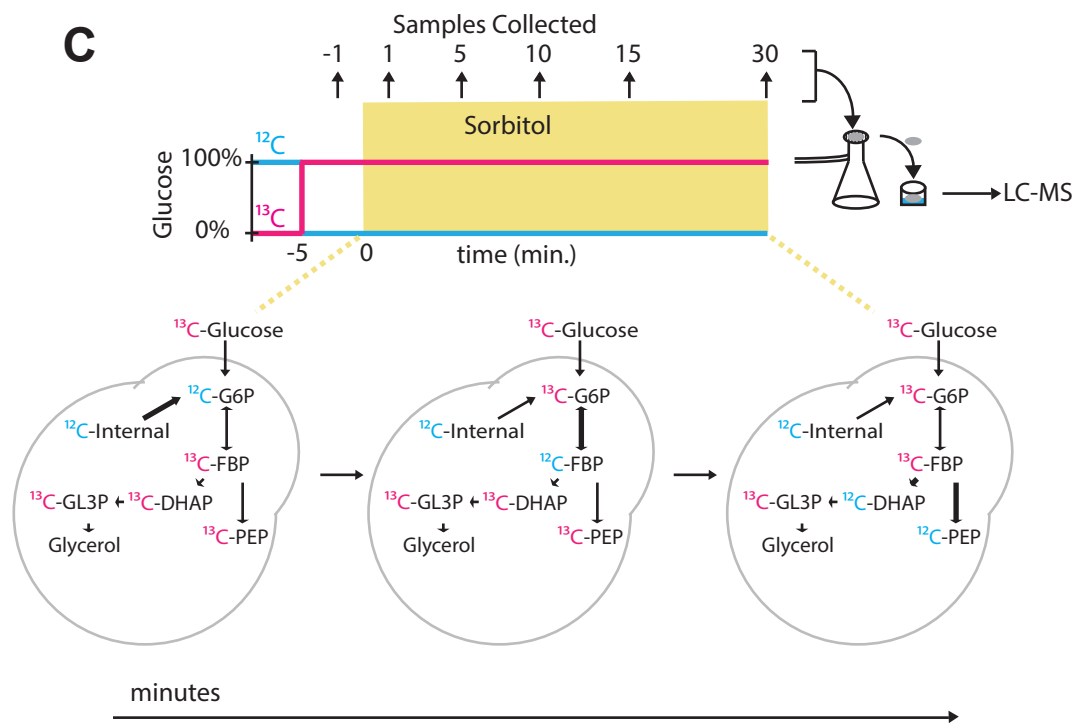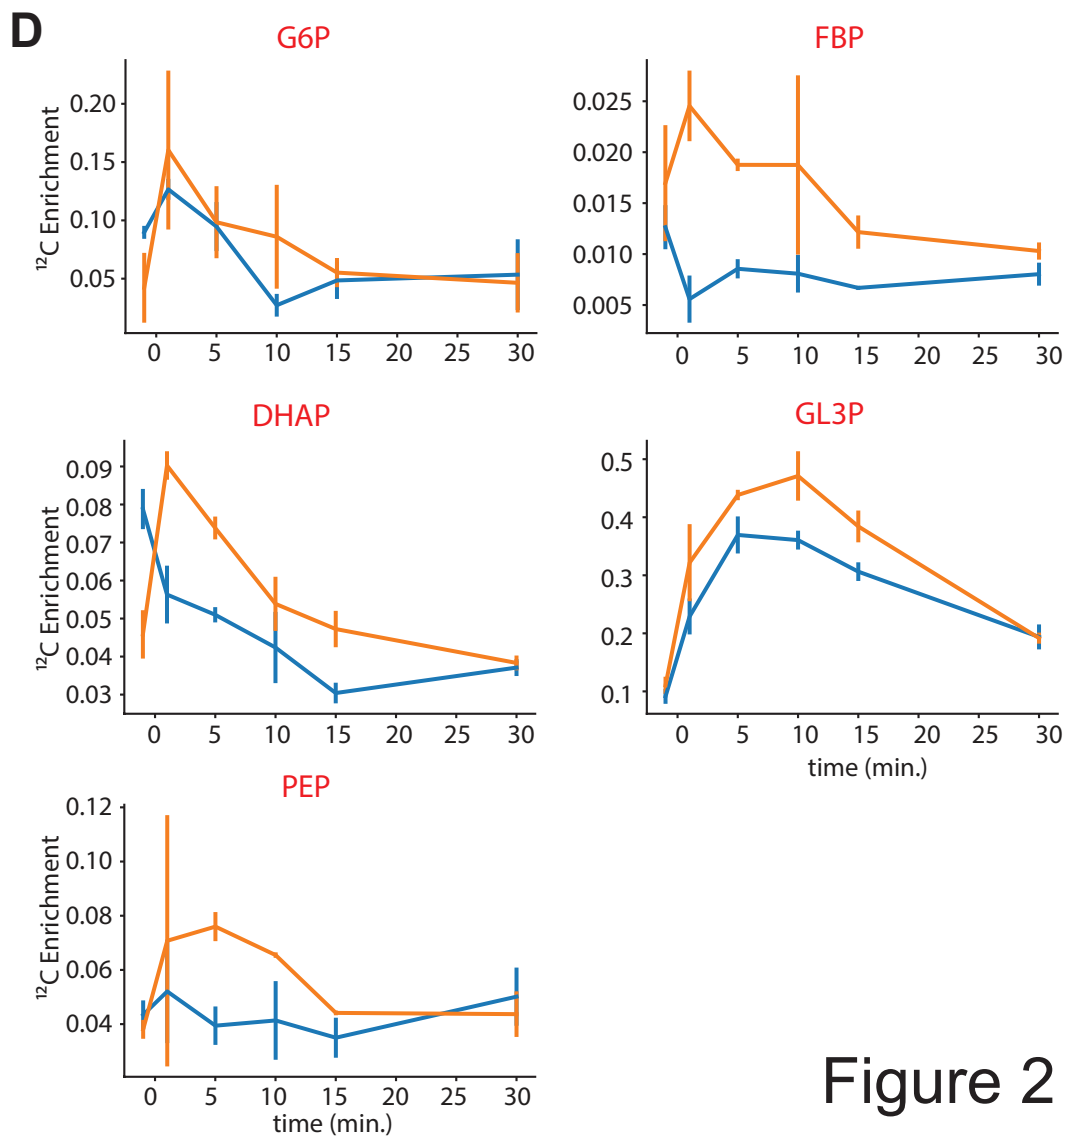

Figure 2

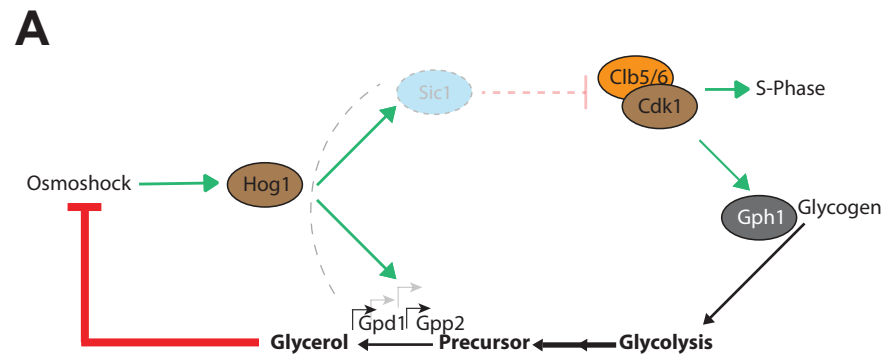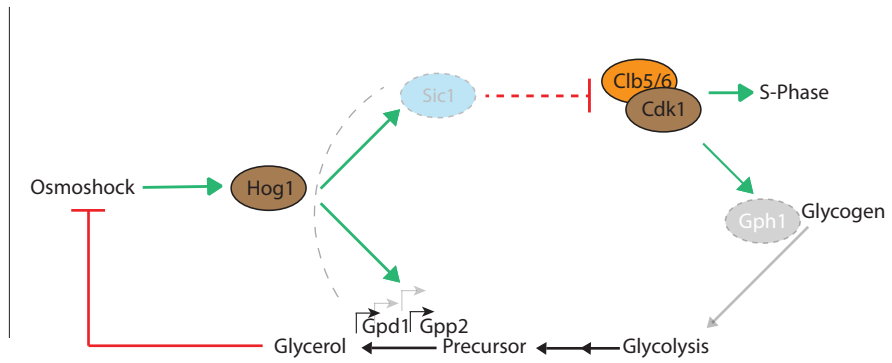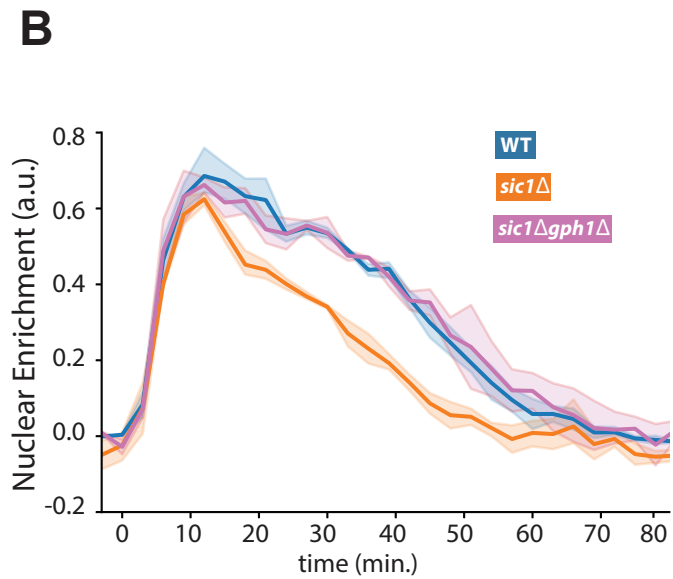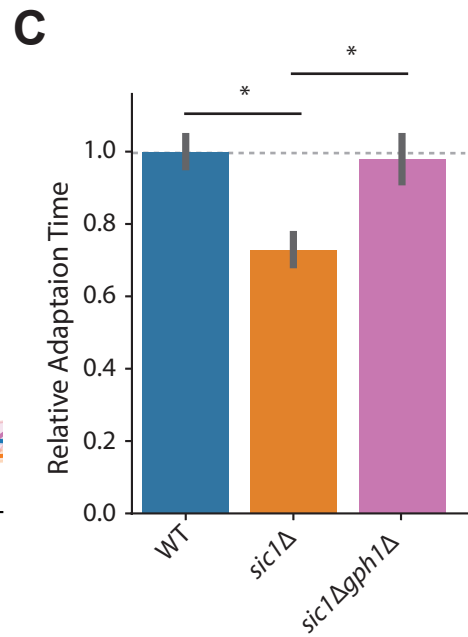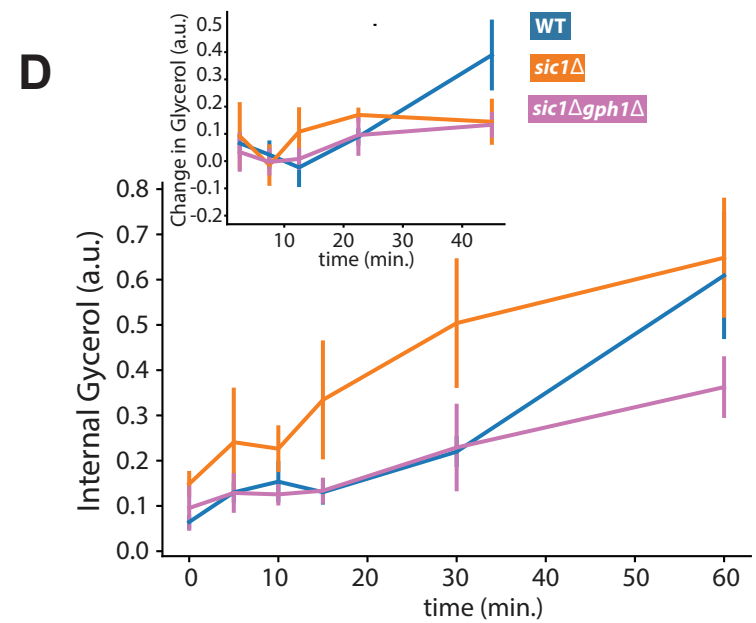

Figure 3



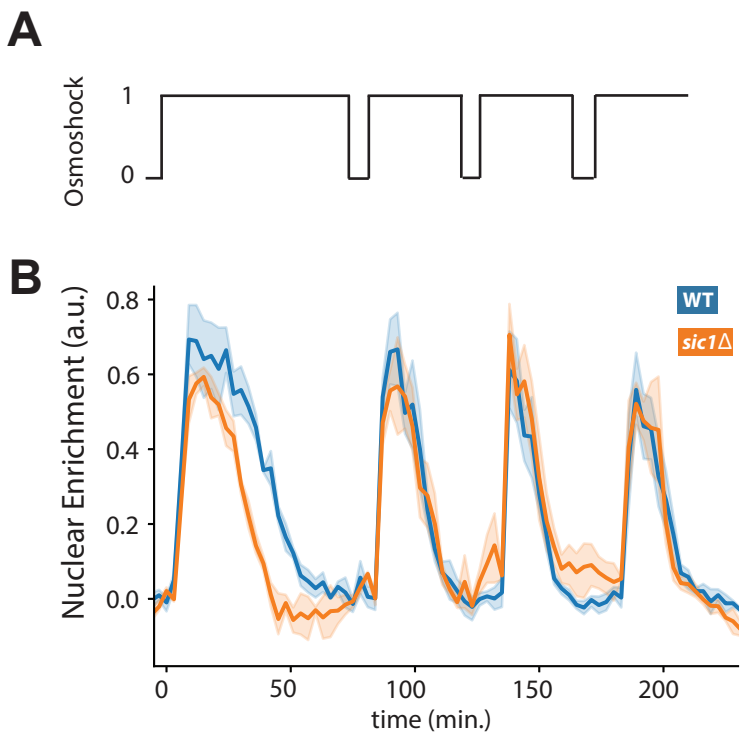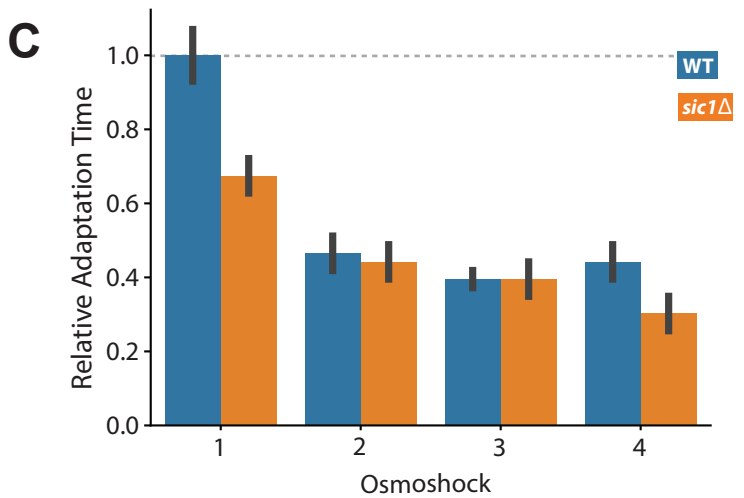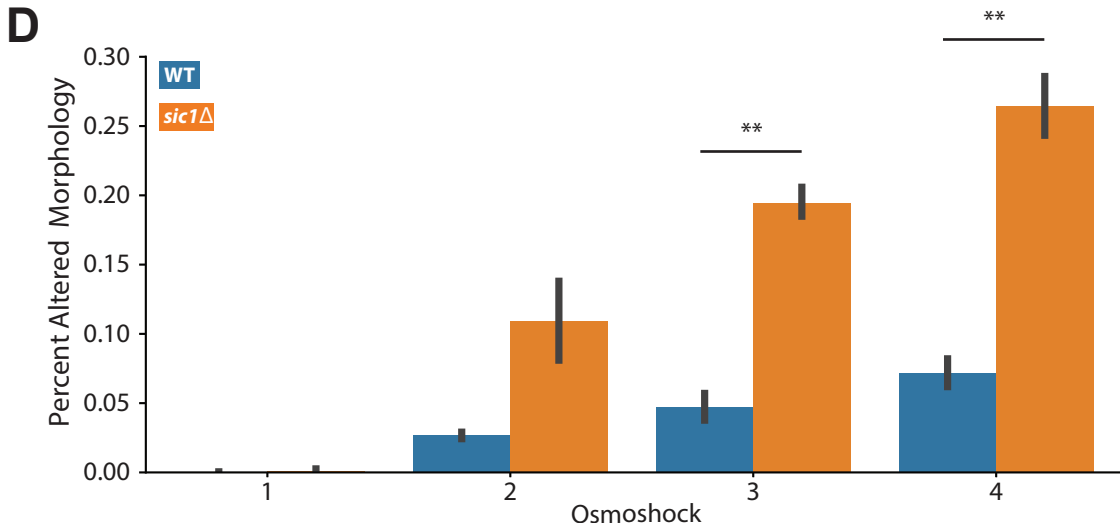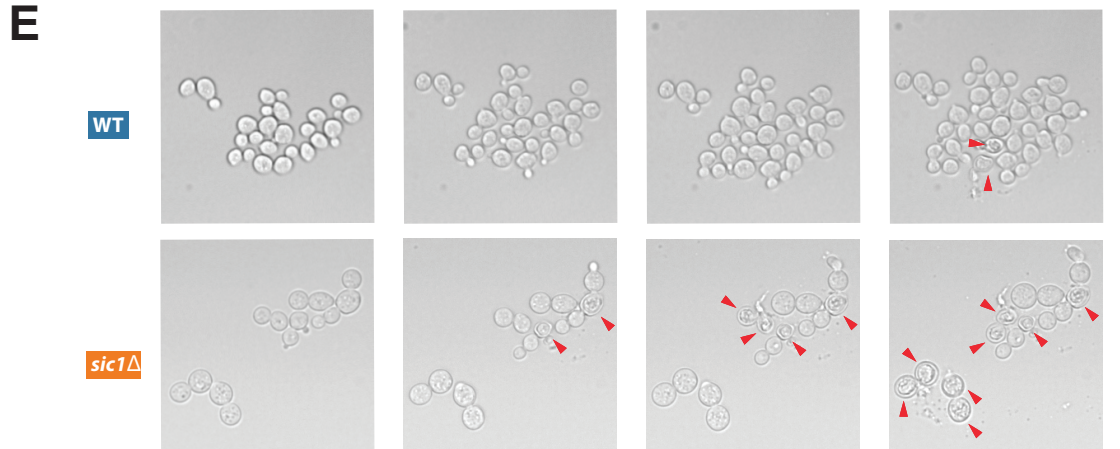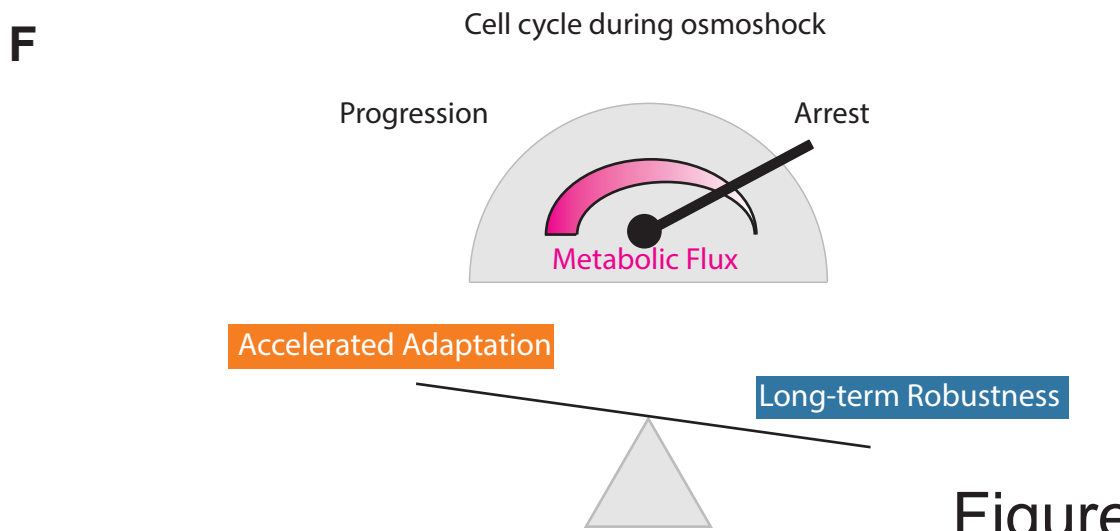

Figure 4
